# Supplementary material
Source: MDPI journal article supplement (https://www.mdpi.com/2673-5601/1/4/30)
Supplement: s1 [file s1]

Figure S1

A

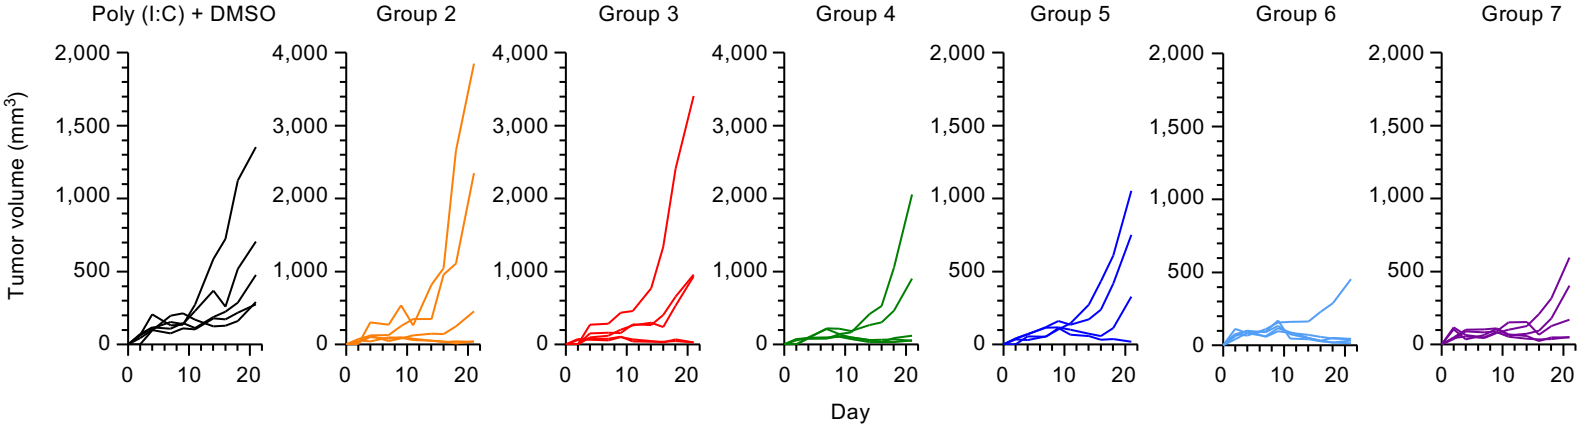

B

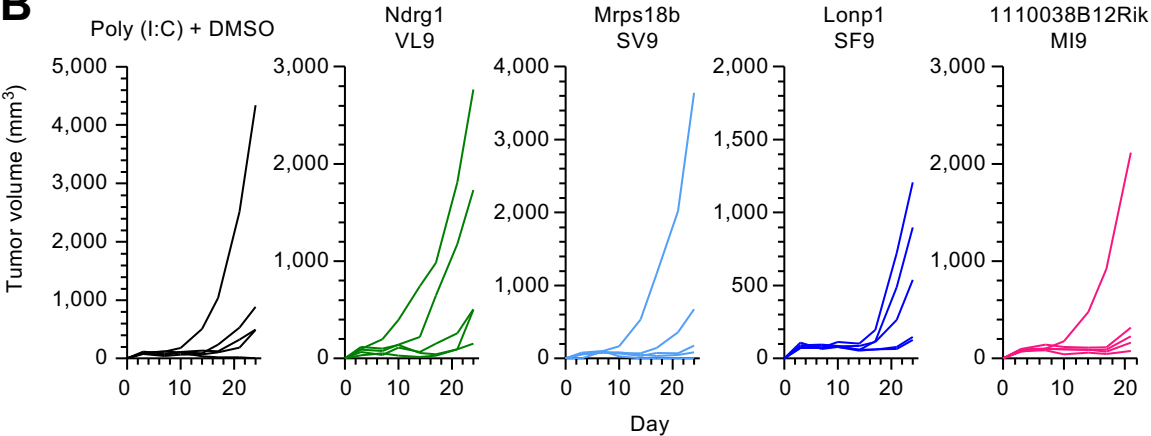

## Supplemental Information

**Figure S1.** Vaccination with cryptic peptides and the growth of CT26 cells in vivo. Fig. 3B, 3D, Fig. S1A, and S1B are drawn with different graph styles but they share the raw data. **A.** Development of CT26 cells after cryptic peptide cocktail vaccination. **B.** Development of CT26 cells after cryptic peptide vaccination. Three cryptic peptides in Group 6 were each administrated as a vaccine independently. 1110038B12Rik-MI9 peptide vaccination was also assessed independently, and the result was summarized as Group 1 in Fig. 3B. As a result, Group 2-7 in Fig. 3B share the same control result data (Poly (I:C) + DMSO) shown in Fig. S1A, and Group 1 in Fig. 3B and three plots in Fig. 3D share the same control data shown in Fig. S1B.
